# Supplementary material for: Urine Proteins Identified by Two-Dimensional Differential Gel Electrophoresis Facilitate the Differential Diagnoses of Scrapie
Source: PLoS One. 2013 May 21;8(5):e64044. doi: 10.1371/journal.pone.0064044 (PMC3660319; doi:10.1371/journal.pone.0064044)
Supplement: Table S1 — Glomerular filtration rate calculations. (XLSX) [file pone.0064044.s002.xlsx]

## Sheet: Sheet1
		Creatinine			Total Protein (g/dL)		Urine		Body Weight (Kg)			GFR
Sample	Days Post Infection	Plasma (umol/L)	Plasma (mg/dL)	urine (mg/dL)	plasma	urine	urine produced (mL)	mL/min	in	out	% loss	(mL/min/Kg)
ctl 7	51	23	26.0176	2200	720	<0.05	0.5	0.000520833	0.0235	0.0196	0.165957	2.04365
ctl 8	51	21	23.7552	1400	540	<0.05	1	0.00104167	0.0243	0.0203	0.164609	2.75292
ctl 9	51	32	36.1984	1200	560	<0.05	2	0.00208333	0.0232	0.0188	0.189655	3.28875
inf 37	51	21	23.7552	800	580	0.09	2	0.00208333	0.0222	0.0183	0.175676	3.4647
inf 38	51	22	24.8864	500	570	0.1	2	0.00208333	0.0227	0.0192	0.154185	1.99794
inf 39	51	17	19.2304	500	580	0.27	2.75	0.00286458	0.0233	0.0197	0.154506	3.46421
ctl 13	80	25	28.28	1900	590	<0.05	1	0.00104167	0.0262	0.0219	0.164122	2.90997
ctl 14	80	27	30.5424	3000	580	<0.05	0.6	0.000625	0.0304	0.0263	0.134868	2.16543
ctl 16	80	26	29.4112	4800	590	<0.05	0.2	0.000208333	0.0247	0.0218	0.117409	1.46239
inf 43	80	31	35.0672	2100	580	<0.05	1.2	0.00125	0.0268	0.0227	0.152985	3.0245
inf 44	80	27	30.5424	1500	580	<0.05	1.75	0.00182292	0.0283	0.024	0.151943	3.4236
inf 45	80	43	48.6416	1800	480	<0.05	1.75	0.00182292	0.0261	0.0222	0.149425	2.79328
ctl 19	100	33	37.3296	2200	510	<0.05	0.8	0.000833333	0.0363	0.0318	0.123967	1.44235
ctl 20	100	34	38.4608	1800	500	<0.05	1	0.00104167	0.0298	0.025	0.161074	1.77923
ctl 21	100	26	29.4112	1900	510	<0.05	0.9	0.0009375	0.0305	0.0258	0.154098	2.15146
inf 49	100	23	26.0176	2400	550	<0.05	0.5	0.000520833	0.0329	0.0291	0.115502	1.54982
inf 50	100	31	35.0672	6800	570	<0.05	0.25	0.000260417	0.0279	0.0249	0.107527	1.91281
inf 51	100	27	30.5424	4700	530	<0.05	0.1	0.000104167	0.0271	0.0242	0.107011	0.624937
ctl 24	120	30	33.936	2100	520	<0.05	1	0.00104167	0.0306	0.0264	0.137255	2.26174
ctl 25	120	24	27.1488	2500	540	<0.05	0.6	0.000625	0.0308	0.0283	0.0811688	1.94765
ctl 27	120	27	30.5424	1400	520	<0.05	1.2	0.00125	0.0307	0.0274	0.107492	1.97237
inf 55	120	27	30.5424	4300	550	<0.05	0.25	0.000260417	0.0272	0.0241	0.113971	1.42938
inf 56	120	26	29.4112	3400	560	<0.05	0.2	0.000208333	0.0277	0.0256	0.0758123	0.903707
inf 57	120	22	24.8864	3700	520	<0.05	0.25	0.000260417	0.03	0.0277	0.0766667	1.34203
