# Supplementary material for: Urine Proteins Identified by Two-Dimensional Differential Gel Electrophoresis Facilitate the Differential Diagnoses of Scrapie
Source: PLoS One. 2013 May 21;8(5):e64044. doi: 10.1371/journal.pone.0064044 (PMC3660319; doi:10.1371/journal.pone.0064044)
Supplement: Table S2 — Statistical analysis of glomerular filtration rate. (XLSX) [file pone.0064044.s003.xlsx]

## Sheet: Sheet1
Anova: Single Factor
SUMMARY
Groups	Count	Sum	Average	Variance
ctl 51 dpi	3	8.08532	2.69511	0.390076
inf 51 dpi	3	8.92685	2.97562	0.716887
ctl 80 dpi	3	6.53779	2.17926	0.52401
inf 80 dpi	3	9.24138	3.08046	0.101675
ctl 100 dpi	3	5.37304	1.79101	0.125814
inf 100 dpi	3	4.08757	1.36252	0.440967
ctl 120 dpi	3	6.18177	2.06059	0.030499
inf 120 dpi	3	3.67512	1.22504	0.0793476
ANOVA
Source of Variation	SS	df	MS	F	P-value	F crit
Between Groups	10.363	7	1.48043	4.91577	0.00400802	2.6572
Within Groups	4.81855	16	0.301159
Total	15.1816	23
t-Test: Two-Sample Assuming Equal Variances
120 dpi
	Variable 1	Variable 2
Mean	2.06059	1.22504
Variance	0.030499	0.0793476
Observations	3	3
Pooled Variance	0.0549233
Hypothesized Mean Difference	0
df	4
t Stat	4.36656
P(T<=t) one-tail	0.00600015
t Critical one-tail	2.13185
P(T<=t) two-tail	0.0120003
t Critical two-tail	2.77645
